# Supplementary material
Source: publisher figshare collection journal article supplement (https://tandf.figshare.com/ndownloader/files/22227399)
Supplement: Supplementary file 1 [file 22227399]

**
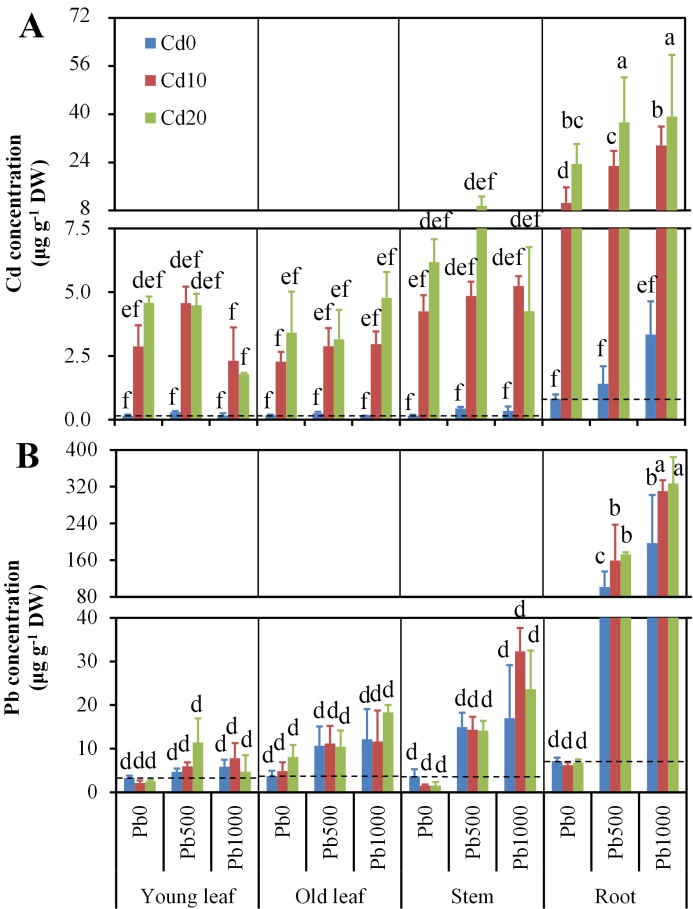
**

**Figure S1.** Concentrations of cadmium (Cd) and lead (Pb) in different parts of alfalfa plants grown on a calcareous soil spiked with different levels of Cd and Pb. (**A**) Cd concentration, and (**B**) Pb concentration. Data are presented as means + SD (*n* = 3). Cd0, Cd10, and Cd20 represents soil Cd level of 0, 10, and 20 mg kg-1, respectively; Pb0, Pb500, and Pb1000 represents soil Pb level of 0, 500, and 1000 mg kg-1, respectively. Different lower-case letters above the bars indicate significant (*P* ≤ 0.05) differences between combinations of Cd х Pb х plant part according to the results of LSD test of three-way (Cd х Pb х plant part) ANOVA.

**
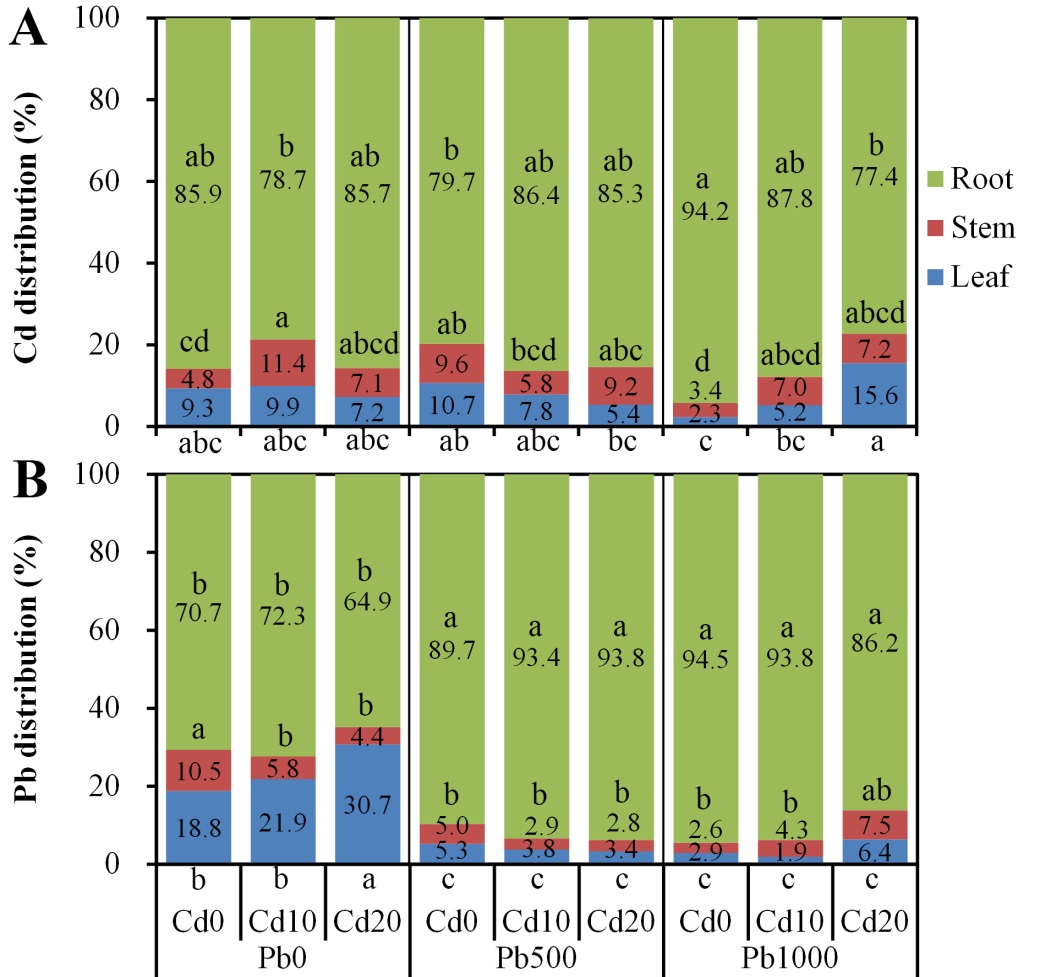
**

**Figure S2.** Distributions of cadmium (Cd) and lead (Pb) in different parts of alfalfa plants grown on a calcareous soil spiked with different levels of Cd and Pb. (**A**) Cd distribution, and(**B**) Pb distribution. Data are the means of three replicates. Cd0, Cd10, and Cd20 represents soil Cd level of 0, 10, and 20 mg kg-1, respectively; Pb0, Pb500, and Pb1000 represents soil Pb level of 0, 500, and 1000 mg kg-1, respectively. Different lower-case letters above the values of root and stem indicate significant (*P* ≤ 0.05) differences between treatments for root and stem, respectively, and different lower-case letters below the values of leaf indicate significant (*P* ≤ 0.05) differences between treatments for leaf, according to the results of LSD test of two-way (Cd х Pb) ANOVA.
